# Supplementary material for: Biomonitoring of 19 Mycotoxins in Plasma from Food-Producing Animals (Cattle, Poultry, Pigs, and Sheep)
Source: MDPI journal article supplement (doi:10.3390/toxins15040295), 2023-04-18
Supplement: s1 [file s1]

**Table S1.** Linearity results for the matrix-matched calibration curves obtained for each mycotoxin in plasma with enzymatic treatment.

| Mycotoxin | Cattle         |                     |             | Pigs           |                     |           | Poultry        |                     |           | Sheep          |                     |           |
|-----------|----------------|---------------------|-------------|----------------|---------------------|-----------|----------------|---------------------|-----------|----------------|---------------------|-----------|
|           | R <sup>2</sup> | Equation            | RE *<br>(%) | R <sup>2</sup> | Equation            | RE<br>(%) | R <sup>2</sup> | Equation            | RE<br>(%) | R <sup>2</sup> | Equation            | RE<br>(%) |
| DOM-1     | 0.9975         | y = 13.54x - 7.62   | 13.4        | 0.9938         | y = 14.48x - 0.16   | 18.0      | 0.9969         | y = 13.76x - 35.26  | 15.6      | 0.9981         | y = 13.24x + 5.29   | 11.0      |
| AFG2      | 0.9976         | y = 129.62x - 7.70  | 20.0        | 0.9982         | y = 134.18x - 53.68 | 18.0      | 0.9968         | y = 138.17x - 20.76 | 12.7      | 0.9982         | y = 136.67x - 5.68  | 9.3       |
| AFM1      | 0.9996         | y = 110.83x - 51.82 | 18.3        | 0.9990         | y = 128.36x + 14.24 | 10.4      | 0.9921         | y = 129.36x - 4.56  | 14.2      | 0.9987         | y = 131.53x + 9.23  | 18.1      |
| AFG1      | 0.9982         | y = 302.26x - 44.49 | 17.4        | 0.9991         | y = 362.45x - 24.14 | 12.1      | 0.9959         | y = 383.54x - 18.36 | 12.7      | 0.9981         | y = 370.44x - 30.74 | 9.8       |
| AFB2      | 0.9983         | y = 370.00x - 7.57  | 14.4        | 0.9908         | y = 351.68x + 7.68  | 11.5      | 0.9956         | y = 355.95x - 5.48  | 13.0      | 0.9982         | y = 350.83x - 56.01 | 18.3      |
| AFB1      | 0.9910         | y = 535.29x - 30.79 | 14.9        | 0.9982         | y = 541.75x - 42.78 | 11.2      | 0.9979         | y = 515.14x + 0.18  | 10.0      | 0.9927         | y = 518.57x + 13.22 | 18.8      |
| HT-2      | 0.9995         | y = 18.19x - 19.69  | 6.3         | 0.9992         | y = 15.76x + 29.27  | 10.0      | 0.9986         | y = 17.36x + 19.28  | 11.1      | 0.9981         | y = 16.83x - 19.45  | 13.2      |
| OTB       | 0.9993         | y = 95.75x + 15.87  | 13.6        | 0.9975         | y = 116.42x - 17.19 | 11.7      | 0.9988         | y = 102.94x - 1.02  | 11.0      | 0.9971         | y = 99.93x + 13.89  | 7.8       |
| T-2       | 0.9982         | y = 97.85x - 5.70   | 6.2         | 0.9990         | y = 99.51x + 32.98  | 11.2      | 0.9952         | y = 105.76x + 0.04  | 11.4      | 0.9977         | y = 102.41x + 20.47 | 13.8      |
| ZEA       | 0.9993         | y = 24.27x - 38.88  | 14.9        | 0.9977         | y = 26.92x - 47.71  | 18.4      | 0.9933         | y = 25.11x - 20.13  | 14.7      | 0.9983         | y = 27.01x - 10.91  | 5.3       |
| OTA-ds    | 0.9958         | y = 66.04x - 11.81  | 9.8         | 0.9994         | y = 50.94x - 11.47  | 9.9       | 0.9994         | y = 62.06x - 56.12  | 16.6      | 0.9931         | y = 55.81x - 54.46  | 11.3      |
| STER      | 0.9900         | y = 123.45x + 2.38  | 14.7        | 0.9945         | y = 97.23x + 27.59  | 15.3      | 0.9906         | y = 100.32x - 16.49 | 15.7      | 0.9983         | y = 109.78x - 31.39 | 15.2      |
| NIV       | 0.9976         | y = 3.56x - 37.95   | 19.0        | 0.9979         | y = 3.44x - 34.18   | 15.4      | 0.9937         | y = 3.23x + 23.64   | 13.9      | 0.9993         | y = 3.64x - 45.56   | 17.9      |
| DON       | 0.9910         | y = 7.66x - 6.97    | 11.3        | 0.9994         | y = 7.32x + 10.54   | 13.3      | 0.9993         | y = 7.65x - 12.23   | 12.7      | 0.9979         | y = 8.84x - 51.71   | 19.0      |
| FUS-X     | 0.9937         | y = 11.12x - 12.79  | 10.4        | 0.9959         | y = 10.43x - 41.29  | 12.3      | 0.9974         | y = 10.01x - 4.61   | 14.2      | 0.9994         | y = 10.05x - 18.90  | 4.2       |
| NEO       | 0.9908         | y = 88.03x - 0.41   | 15.0        | 0.9967         | y = 77.09x + 30.83  | 14.0      | 0.9983         | y = 87.48x - 9.06   | 13.8      | 0.9980         | y = 91.31x - 22.35  | 11.8      |
| 3-ADON    | 0.9992         | y = 39.40x - 25.20  | 11.5        | 0.9980         | y = 39.57x - 18.48  | 12.1      | 0.9975         | y = 39.99x + 19.09  | 14.6      | 0.9954         | y = 40.91x - 10.73  | 13.0      |
| 15-ADON   | 0.9963         | y = 25.89x - 11.45  | 14.1        | 0.9993         | y = 24.77x - 22.41  | 10.4      | 0.9954         | y = 23.19x + 23.94  | 13.2      | 0.9907         | y = 27.08x - 10.15  | 13.6      |
| DAS       | 0.9904         | y = 100.45x - 16.12 | 10.5        | 0.9985         | y = 97.36x + 0.75   | 12.2      | 0.9994         | y = 100.61x - 27.23 | 8.5       | 0.9991         | y = 103.69x + 8.21  | 11.1      |

\* RE(%): The maximum value of relative errors of back calculated concentrations is shown.

**Table S2:** Qualification/quantification peak areas ratio and retention times (min) for each one of the mycotoxins in a standard (fortified mobile phase) and a calibrator (fortified pig plasma) at LOQ level without enzymatic treatment.

| Mycotoxin          | q/Q Standard | q/Q Calibrator | RE (%) | RT Standard (min) | RT Calibrator (min) | RE (%) |
|--------------------|--------------|----------------|--------|-------------------|---------------------|--------|
| DOM-1              | 84.3         | 84.5           | 0.2    | 1.4               | 1.5                 | 1.3    |
| AFG2               | 79.2         | 80.6           | 1.7    | 2.4               | 2.4                 | 0.6    |
| AFM1               | 82.7         | 80.8           | 2.3    | 2.5               | 2.5                 | 0.9    |
| AFG1               | 76.1         | 83.9           | 9.3    | 2.9               | 2.9                 | 0.8    |
| AFB2               | 101.3        | 105.1          | 3.6    | 3.7               | 3.6                 | 1.5    |
| AFB1               | 68.5         | 73.6           | 6.9    | 4.5               | 4.5                 | 0.2    |
| HT-2               | 61.1         | 66.5           | 8.1    | 9.6               | 9.6                 | 0.1    |
| OTB                | 44.5         | 46.1           | 3.5    | 11.6              | 11.5                | 0.2    |
| T-2                | 71.6         | 70.2           | 2.0    | 13.2              | 13.2                | 0.2    |
| ZEA                | 80.2         | 84.8           | 5.4    | 14.8              | 14.8                | 0.1    |
| OTA-d <sub>5</sub> | 64.8         | 65.5           | 1.1    | 15.7              | 15.7                | 0.2    |
| STER               | 79.7         | 85.9           | 7.2    | 15.8              | 15.8                | 0.0    |
| NIV                | 95.1         | 95.6           | 0.5    | 4.1               | 4.1                 | 0.2    |
| DON                | 86.7         | 90.3           | 4.1    | 2.4               | 2.4                 | 0.6    |
| FUS-X              | 77.9         | 74.7           | 4.1    | 8.0               | 8.0                 | 0.1    |
| NEO                | 81.2         | 85.3           | 4.8    | 8.7               | 8.7                 | 0.0    |
| 3-ADON             | 81.4         | 76.3           | 6.3    | 10.0              | 9.9                 | 0.5    |
| 15-ADON            | 91.8         | 90.9           | 1.0    | 10.1              | 10.1                | 0.3    |
| DAS                | 74.55        | 67.3           | 9.8    | 14.0              | 14.0                | 0.2    |

q: Transition of qualification. Q: Transition of quantification. RE: relative error. RT: retention time.

**Table S3.** Matrix effect and recovery (at LOQ), and precision, and accuracy in fortified pig plasma and with enzymatic treatment.

| Mycotoxin          | Matrix effect (%) | Recovery (%) | Precision (RSD%) (n=3) |        |         | Accuracy (RE%) n=3 |        |         |
|--------------------|-------------------|--------------|------------------------|--------|---------|--------------------|--------|---------|
|                    |                   |              | LOQ *                  | 6× LOQ | 30× LOQ | LOQ                | 6× LOQ | 30× LOQ |
| DOM-1              | 98.4              | 85.5         | 9.1                    | 4.5    | 1.5     | 2.0                | 4.6    | 11.8    |
| AFG2               | 85.8              | 95.2         | 13.5                   | 4.7    | 3.2     | 6.5                | 5.3    | 2.6     |
| AFM1               | 96.3              | 91.4         | 11.6                   | 2.9    | 1.9     | 5.2                | 4.2    | 3.1     |
| AFG1               | 88.4              | 95.0         | 10.5                   | 2.4    | 2.3     | 3.5                | 7.7    | 4.0     |
| AFB2               | 88.5              | 91.7         | 9.4                    | 2.7    | 4.3     | 6.4                | 5.1    | 1.9     |
| AFB1               | 89.1              | 95.2         | 9.9                    | 2.9    | 4.0     | 5.6                | 5.1    | 3.1     |
| HT-2               | 102.5             | 90.2         | 8.7                    | 2.6    | 2.3     | 10.8               | 4.5    | 0.8     |
| OTB                | 87.6              | 85.2         | 9.4                    | 4.4    | 2.2     | 3.3                | 3.3    | 1.1     |
| T-2                | 85.3              | 95.4         | 8.7                    | 1.5    | 1.8     | 9.7                | 4.8    | 5.9     |
| ZEA                | 93.7              | 100.0        | 7.2                    | 2.1    | 1.6     | 6.3                | 4.7    | 4.7     |
| OTA-d <sub>5</sub> | 84.7              | 91.5         | 6.2                    | 1.6    | 2.5     | 5.4                | 6.7    | 1.8     |
| STER               | 85.2              | 81.5         | 8.6                    | 2.1    | 5.4     | 7.1                | 7.6    | 3.9     |
| NIV                | 93.9              | 95.2         | 6.8                    | 3.7    | 4.5     | 12.6               | 8.6    | 4.1     |
| DON                | 85.0              | 84.9         | 12.6                   | 2.7    | 5.9     | 8.0                | 3.0    | 2.2     |
| FUS-X              | 109.7             | 112.8        | 13.2                   | 7.0    | 5.3     | 11.0               | 5.2    | 9.1     |
| NEO                | 90.1              | 85.7         | 7.5                    | 4.2    | 3.5     | 9.8                | 2.6    | 2.5     |
| 3-ADON             | 113.9             | 87.8         | 12.9                   | 5.3    | 3.4     | 2.9                | 1.2    | 1.4     |
| 15-ADON            | 102.1             | 112.8        | 7.6                    | 5.1    | 4.0     | 3.8                | 7.0    | 2.6     |
| DAS                | 87.2              | 87.8         | 12.1                   | 5.2    | 3.5     | 6.2                | 3.5    | 3.7     |

\* LOQ: limit of quantification. RSD: relative standard deviation, RE: relative error.

**Table S4.** Results obtained for STER (ng/mL) in samples with enzymatic treatment of the plasma.

| <b>Sample</b> | <b>Cattle</b> | <b>Pigs</b> | <b>Poultry</b> | <b>Sheep</b> |
|---------------|---------------|-------------|----------------|--------------|
| 1             | 2.57          | <i>0.91</i> | <i>0.83</i>    | <i>0.89</i>  |
| 2             | 3.18          | 1.47        | 2.78           | 2.93         |
| 3             | 1.59          | 2.28        | 1.16           | 3.60         |
| 4             | 1.30          | 1.33        | 2.91           | 1.08         |
| 5             | 3.70          | 2.40        | <i>0.77</i>    | <i>0.97</i>  |
| 6             | 2.15          | 1.62        | 1.32           | 1.38         |
| 7             | 1.02          | 1.99        | 1.80           | <i>0.96</i>  |
| 8             | 1.77          | 2.74        | 1.30           | 3.04         |
| 9             | 1.61          | 3.93        | 3.55           | 1.44         |
| 10            | 1.19          | 2.91        | 1.15           | <i>0.82</i>  |
| 11            | <i>0.97</i>   | 4.65        | 3.09           | 4.91         |
| 12            | 1.50          | 4.71        | 2.07           | 3.45         |
| 13            | 1.13          | 4.46        | 1.59           | 1.51         |
| 14            | 1.37          | 2.15        | 2.10           | 3.54         |
| 15            | 3.35          | 4.41        | 2.55           | 3.80         |
| 16            | 3.90          | 1.12        | 1.06           | <i>0.81</i>  |
| 17            | 4.25          | 4.96        | 3.91           | 4.66         |
| 18            | 3.41          | 3.20        | 3.82           | 1.67         |
| 19            | 4.07          | 4.71        | <i>0.70</i>    | 3.72         |
| 20            | 3.74          | 1.92        | <i>0.81</i>    | 3.53         |

LOD: 0.2 ng/mL, LOQ: 1.0 ng/mL. Italics >LOD and <LOQ value.

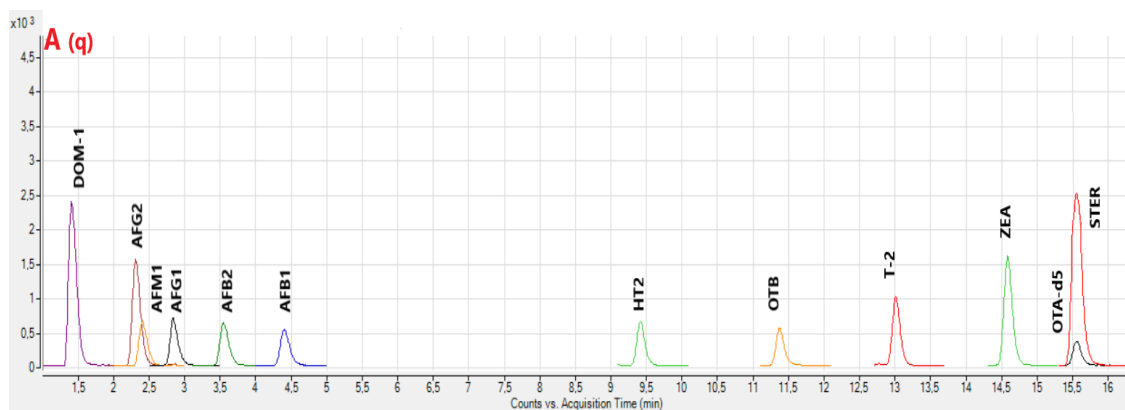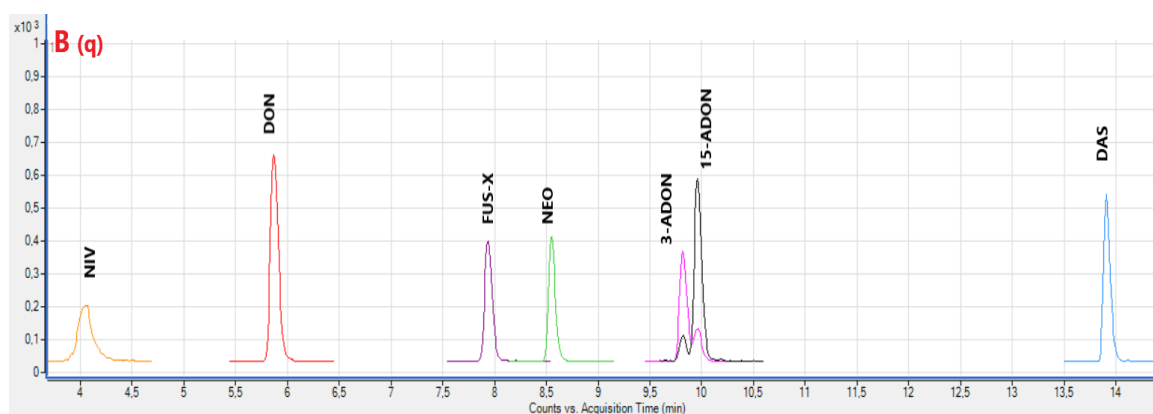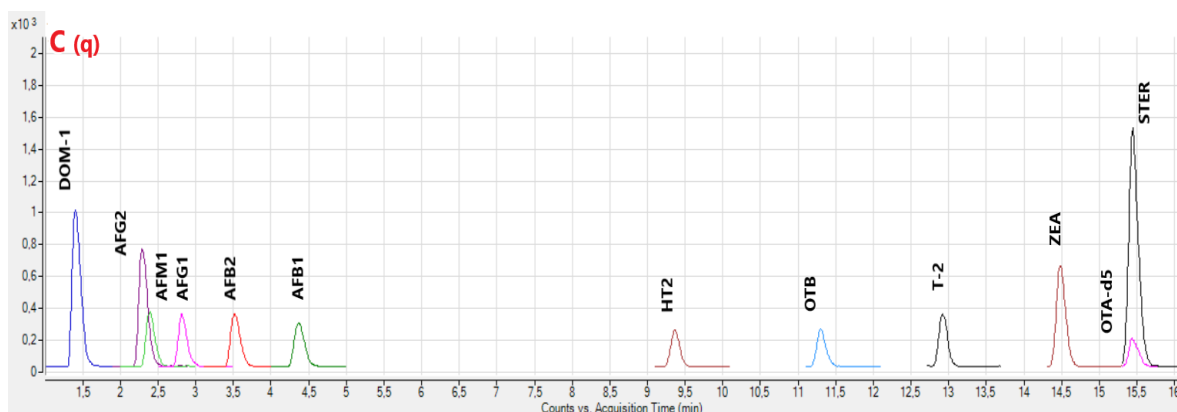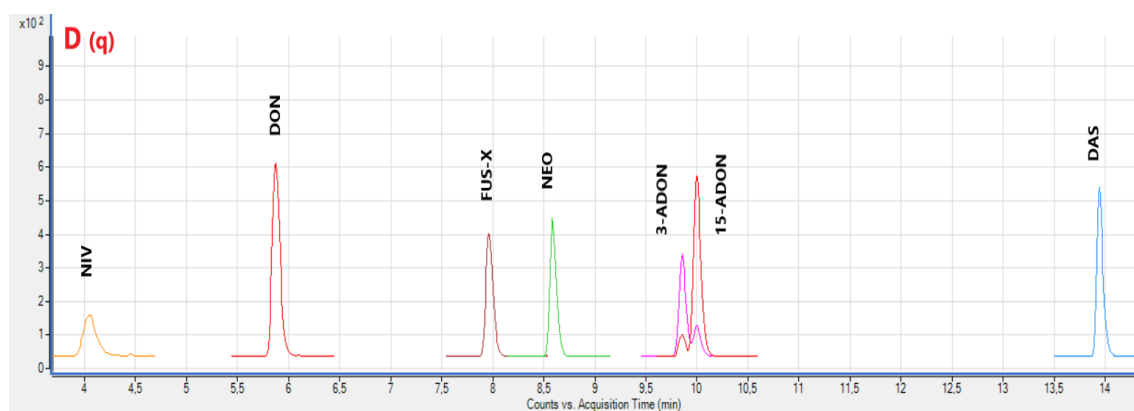

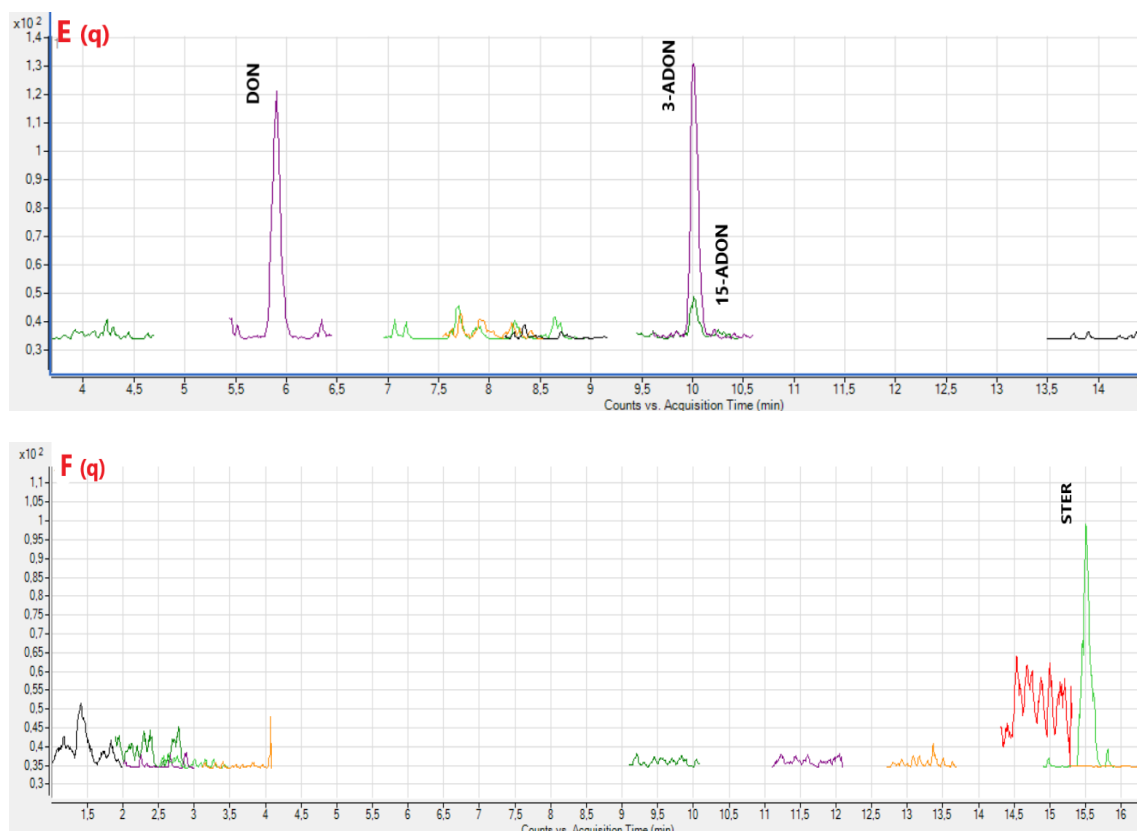

**Figure S1.** (A) Superposed chromatograms (q) obtained from a calibrator at  $10\times$  LOQ level without enzymatic treatment (mycotoxins from group I). (B) Superposed chromatograms (q) obtained from a calibrator at  $10\times$  LOQ levels without enzymatic treatment (mycotoxins from group II). (C) Superposed chromatograms (q) obtained from a calibrator at  $10\times$  LOQ levels with enzymatic treatment (mycotoxins from group I). (D) Superposed chromatograms (q) obtained from a calibrator at  $10\times$  LOQ levels with enzymatic treatment (mycotoxins from group II). (E) Superposed chromatograms (q) obtained from a sample of poultry plasma without enzymatic treatment containing DON, 3- and 15- ADON). (F) Superposed chromatograms (q) from a sample of poultry plasma with enzymatic treatment containing STER.
